# Supplementary material for: Volatile organic compound fluxes in the agricultural San Joaquin Valley – spatial distribution, source attribution, and inventory comparison
Source: Copernicus journal article supplement (doi:10.5194/acp-23-12753-2023), 2023-10-12
Supplement: Supplementary file 1 [file acp-23-12753-2023-supplement.zip]

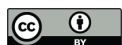

*Supplement of*

**Volatile organic compound fluxes in the agricultural San Joaquin Valley – spatial distribution, source attribution, and inventory comparison**

**Eva Y. Pfannerstill et al.**

*Correspondence to:* Eva Y. Pfannerstill ([eva.pfannerstill@berkeley.edu](mailto:eva.pfannerstill@berkeley.edu)) and Allen H. Goldstein ([ahg@berkeley.edu](mailto:ahg@berkeley.edu))

- [acp-23-12753-2023-supplement-title-page.pdf](#)
- [SI\\_SJV\\_VOC\\_EP\\_rev.docx](#)
- [Table S1.xlsx](#)
- [Table S2.xlsx](#)

The copyright of individual parts of the supplement might differ from the article licence.
